# Supplementary material for: Evidence of proton-coupled mixed-valency by electrochemical behavior on transition metal complex dimers bridged by two Ag+ions
Source: Royal Society of Chemistry journal article supplement (doi:10.1039/c8dt03962c), 2018-12-07
Supplement: c8dt03962c1.pdf [file c8dt03962c1.pdf]

## Supplementary Data

### An Evidence of Proton-Coupled Mixed-Valency by Electrochemical Behavior on Transition Metal Complex Dimers Bridged by two Ag<sup>+</sup> Ions

Makoto Tadokoro<sup>a\*</sup>, Kazuo Isogai<sup>a\*</sup>, Shohei Harada<sup>a</sup>, Takaya Kouchi<sup>a</sup>, Takeshi Yamane<sup>a</sup>, Tomoaki Sugaya<sup>b</sup>, Hajime Kamebuchi<sup>a</sup>

|            |                                                                                                                                                                                                                                                                |
|------------|----------------------------------------------------------------------------------------------------------------------------------------------------------------------------------------------------------------------------------------------------------------|
| Figure S1  | IR spectrum of [Re <sup>III</sup> Cl <sub>2</sub> (P <sup>n</sup> Pr <sub>3</sub> ) <sub>2</sub> (Hbim)] <sub>2</sub> (2)                                                                                                                                      |
| Figure S2  | IR spectra of (a) [Re <sup>III</sup> Cl <sub>2</sub> (P <sup>n</sup> Pr <sub>3</sub> ) <sub>2</sub> (Agbim)] <sub>2</sub> (4) and (b) [Os <sup>III</sup> Cl <sub>2</sub> (P <sup>n</sup> Pr <sub>3</sub> ) <sub>2</sub> (Agbim)] <sub>2</sub> (5)              |
| Figure S3  | UV- <i>vis</i> absorption spectrum of [Re <sup>III</sup> Cl <sub>2</sub> (P <sup>n</sup> Pr <sub>3</sub> ) <sub>2</sub> (Hbim)] <sub>2</sub> (2) in CH <sub>2</sub> Cl <sub>2</sub>                                                                            |
| Figure S4  | UV- <i>vis</i> absorption spectrum of [Os <sup>III</sup> Cl <sub>2</sub> (P <sup>n</sup> Pr <sub>3</sub> ) <sub>2</sub> (Hbim)] <sub>2</sub> (3) in CH <sub>2</sub> Cl <sub>2</sub>                                                                            |
| Figure S5  | UV- <i>vis</i> absorption spectrum of [Re <sup>III</sup> Cl <sub>2</sub> (P <sup>n</sup> Pr <sub>3</sub> ) <sub>2</sub> (Agbim)] <sub>2</sub> (4) in CH <sub>2</sub> Cl <sub>2</sub>                                                                           |
| Figure S6  | UV- <i>vis</i> absorption spectrum of [Os <sup>III</sup> Cl <sub>2</sub> (P <sup>n</sup> Pr <sub>3</sub> ) <sub>2</sub> (Agbim)] <sub>2</sub> (5) in CH <sub>2</sub> Cl <sub>2</sub>                                                                           |
| Figure S7  | The results of DPV measurements on [Re <sup>III</sup> Cl <sub>2</sub> (P <sup>n</sup> Pr <sub>3</sub> ) <sub>2</sub> (Agbim)] <sub>2</sub> (4) and [Os <sup>III</sup> Cl <sub>2</sub> (P <sup>n</sup> Pr <sub>3</sub> ) <sub>2</sub> (Agbim)] <sub>2</sub> (5) |
| Figure S8  | UV- <i>vis</i> absorption at pH = 2.37~4.22 of [Re <sup>III</sup> Cl <sub>2</sub> (P <sup>n</sup> Pr <sub>3</sub> ) <sub>2</sub> (H <sub>2</sub> bim)]Cl for Pourbaix Diagram                                                                                  |
| Figure S9  | UV- <i>vis</i> absorption at pH = 4.40~4.22 of [Re <sup>III</sup> Cl <sub>2</sub> (P <sup>n</sup> Pr <sub>3</sub> ) <sub>2</sub> (H <sub>2</sub> bim)]Cl for Pourbaix Diagram                                                                                  |
| Figure S10 | UV- <i>vis</i> absorption at pH = 6.39~9.45 of [Re <sup>III</sup> Cl <sub>2</sub> (P <sup>n</sup> Pr <sub>3</sub> ) <sub>2</sub> (H <sub>2</sub> bim)]Cl for Pourbaix Diagram                                                                                  |
| Figure S11 | UV- <i>vis</i> absorption at pH = 9.61~11.43 of [Re <sup>III</sup> Cl <sub>2</sub> (P <sup>n</sup> Pr <sub>3</sub> ) <sub>2</sub> (H <sub>2</sub> bim)]Cl for Pourbaix Diagram                                                                                 |
| Figure S12 | UV- <i>vis</i> absorption at pH = 11.60~12.00 of [Re <sup>III</sup> Cl <sub>2</sub> (P <sup>n</sup> Pr <sub>3</sub> ) <sub>2</sub> (H <sub>2</sub> bim)]Cl for Pourbaix Diagram                                                                                |
| Table S1   | Bond distances(Å) and angles(°) around metal coordination of [Re <sup>III</sup> Cl <sub>2</sub> (P <sup>n</sup> Pr <sub>3</sub> ) <sub>2</sub> (Hbim)] <sub>2</sub> (2)                                                                                        |
| Table S2   | Bond distances(Å) and angles(°) around metal coordination of [Os <sup>III</sup> Cl <sub>2</sub> (P <sup>n</sup> Pr <sub>3</sub> ) <sub>2</sub> (Hbim)] <sub>2</sub> (3)                                                                                        |
| Table S3   | Bond distances(Å) and angles(°) around metal coordination of [Re <sup>III</sup> Cl <sub>2</sub> (P <sup>n</sup> Pr <sub>3</sub> ) <sub>2</sub> (Agbim)] <sub>2</sub> (4)                                                                                       |
| Table S4   | Bond distances(Å) and angles(°) around metal coordination of [Os <sup>III</sup> Cl <sub>2</sub> (P <sup>n</sup> Pr <sub>3</sub> ) <sub>2</sub> (Agbim)] <sub>2</sub> (5)                                                                                       |
| Table S5   | Redox potential at each pH of [Re <sup>III</sup> Cl <sub>2</sub> (P <sup>n</sup> Pr <sub>3</sub> ) <sub>2</sub> (H <sub>2</sub> bim)]Cl for Pourbaix Diagram                                                                                                   |

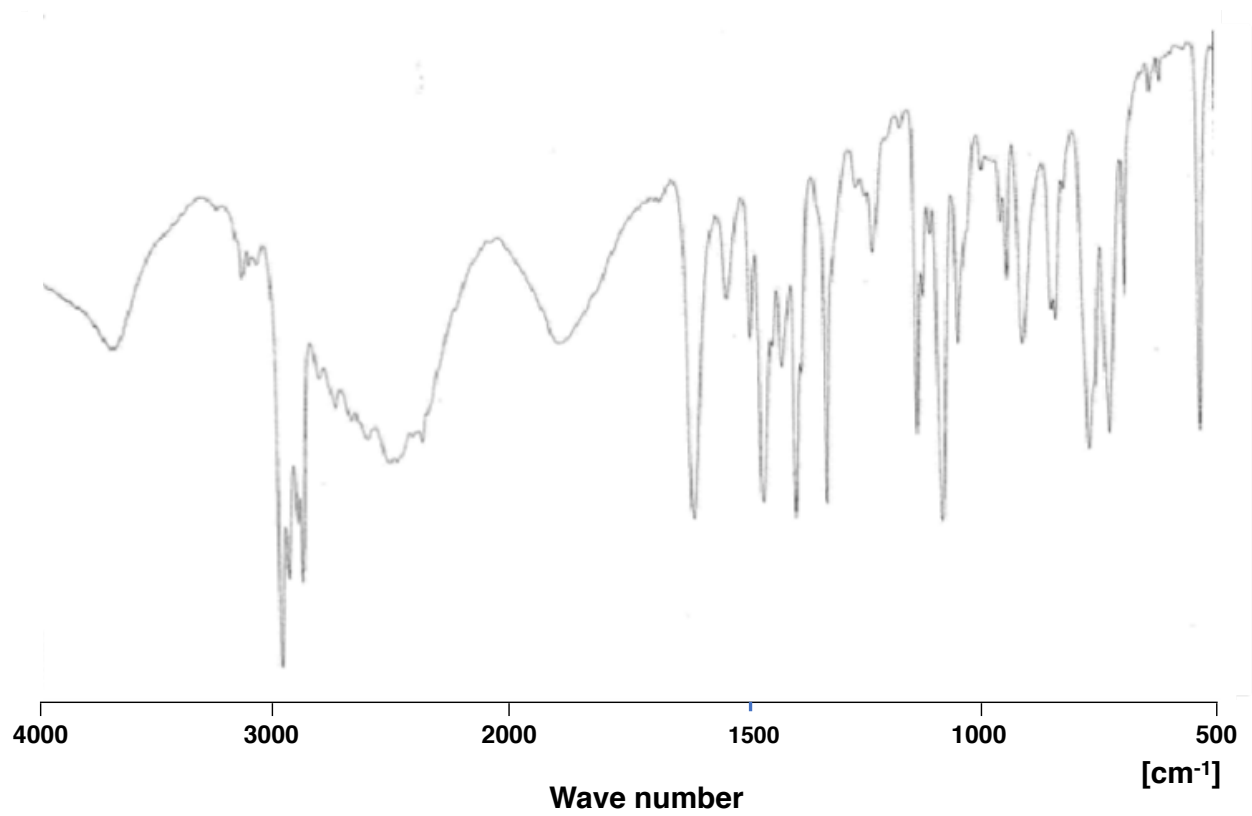

**Figure S1**

**IR spectrum of  $[\text{Re}^{\text{III}}\text{Cl}_2(\text{P}^n\text{Pr}_3)_2(\text{Hbim})]_2(2)$**

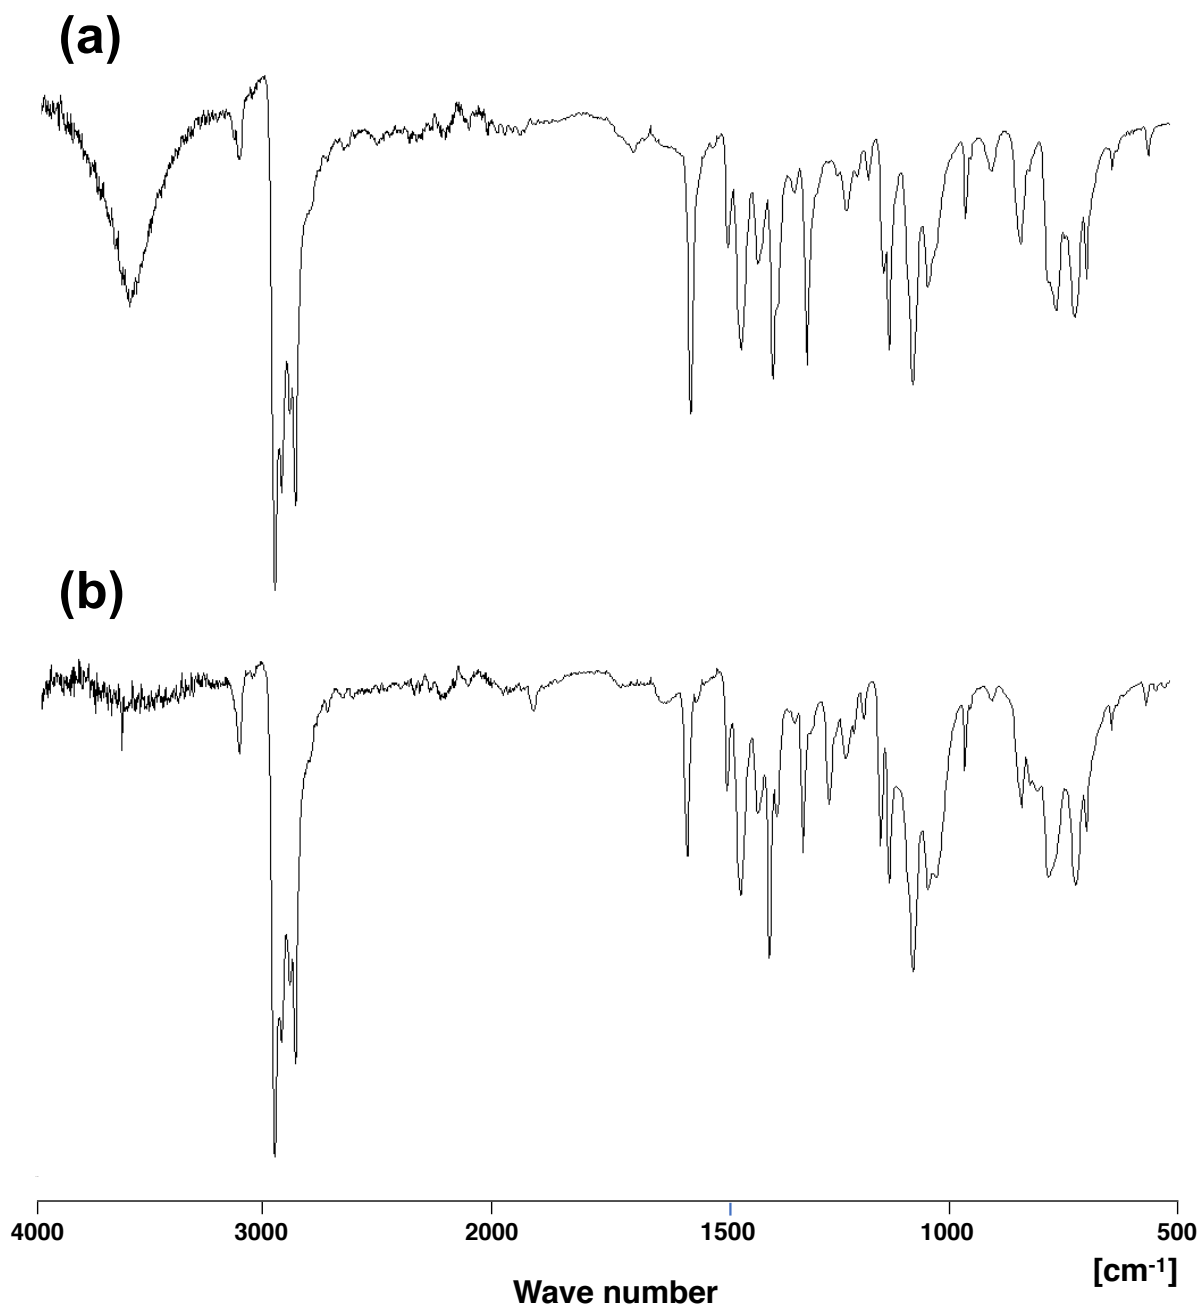

**Figure S2**

**IR spectra of (a)  $[\text{Re}^{\text{III}}\text{Cl}_2(\text{P}^n\text{Pr}_3)_2(\text{Agbim})]_2(4)$  and (b)  $[\text{Os}^{\text{III}}\text{Cl}_2(\text{P}^n\text{Pr}_3)_2(\text{Agbim})]_2(5)$**

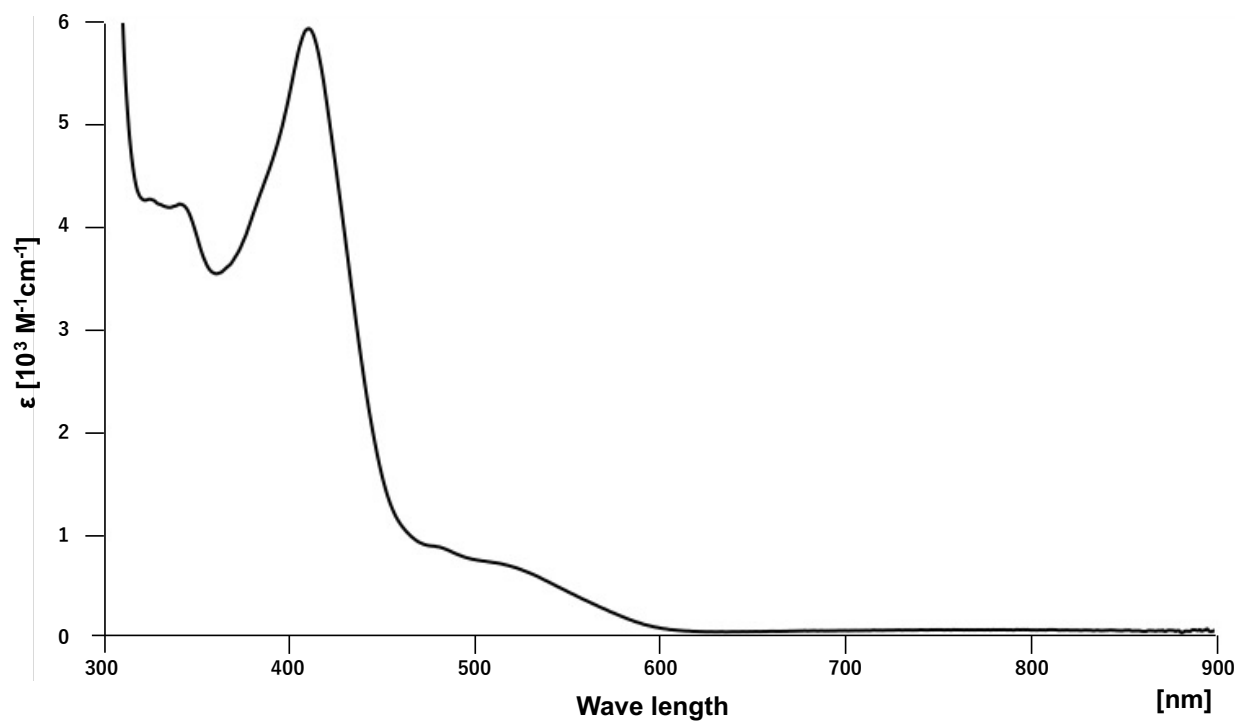

**Figure S3**

**UV-vis absorption spectrum of  $[Re^{III}Cl_2(P^nPr_3)_2(Hbim)]_2$  (2) in  $CH_2Cl_2$**

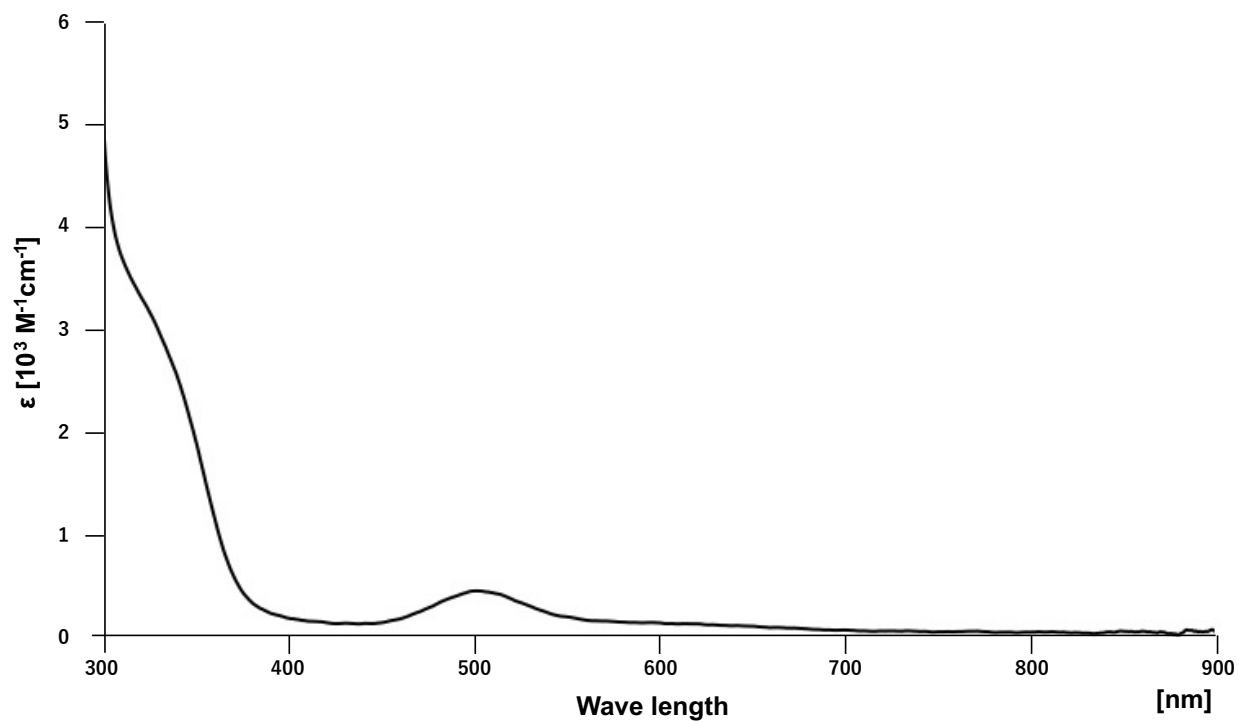

**Figure S4**

**UV-vis absorption spectrum of  $[\text{Os}^{\text{III}}\text{Cl}_2(\text{P}^n\text{Pr}_3)_2(\text{Hbim})]_2(3)$  in  $\text{CH}_2\text{Cl}_2$**

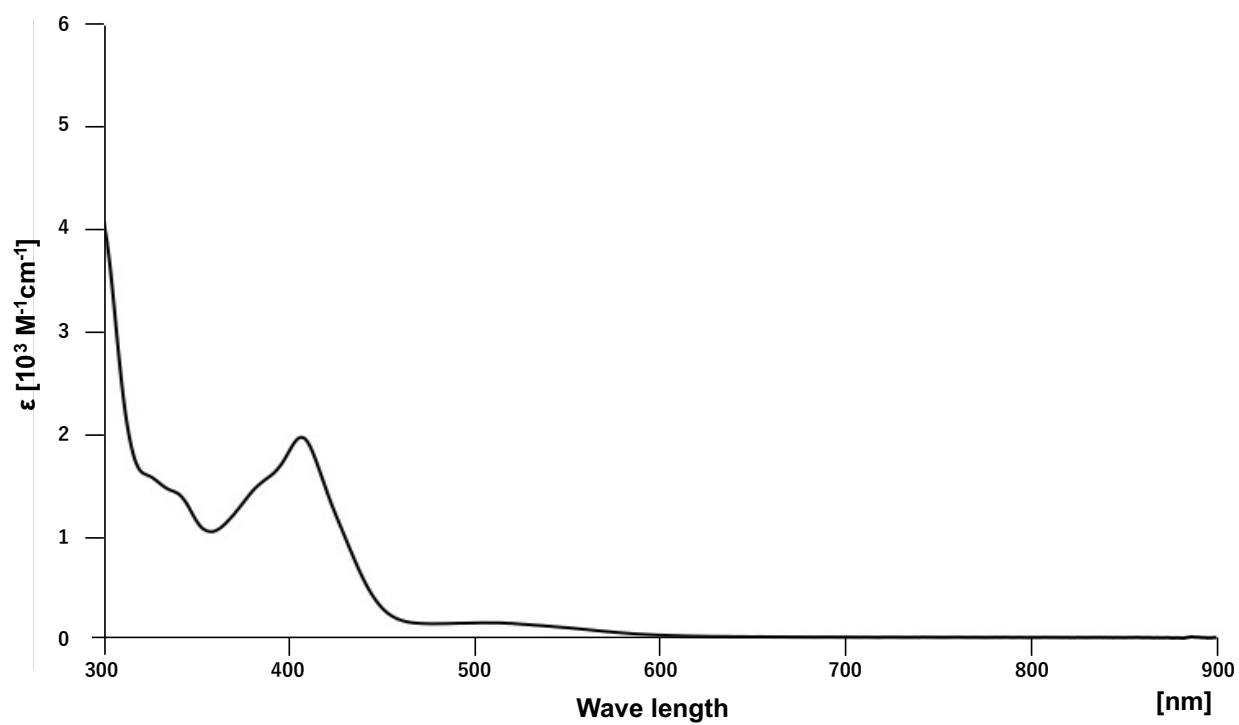

**Figure S5**

**UV-vis absorption spectrum of  $[\text{Re}^{\text{III}}\text{Cl}_2(\text{P}^n\text{Pr}_3)_2(\text{Agbim})]_2(4)$  in  $\text{CH}_2\text{Cl}_2$**

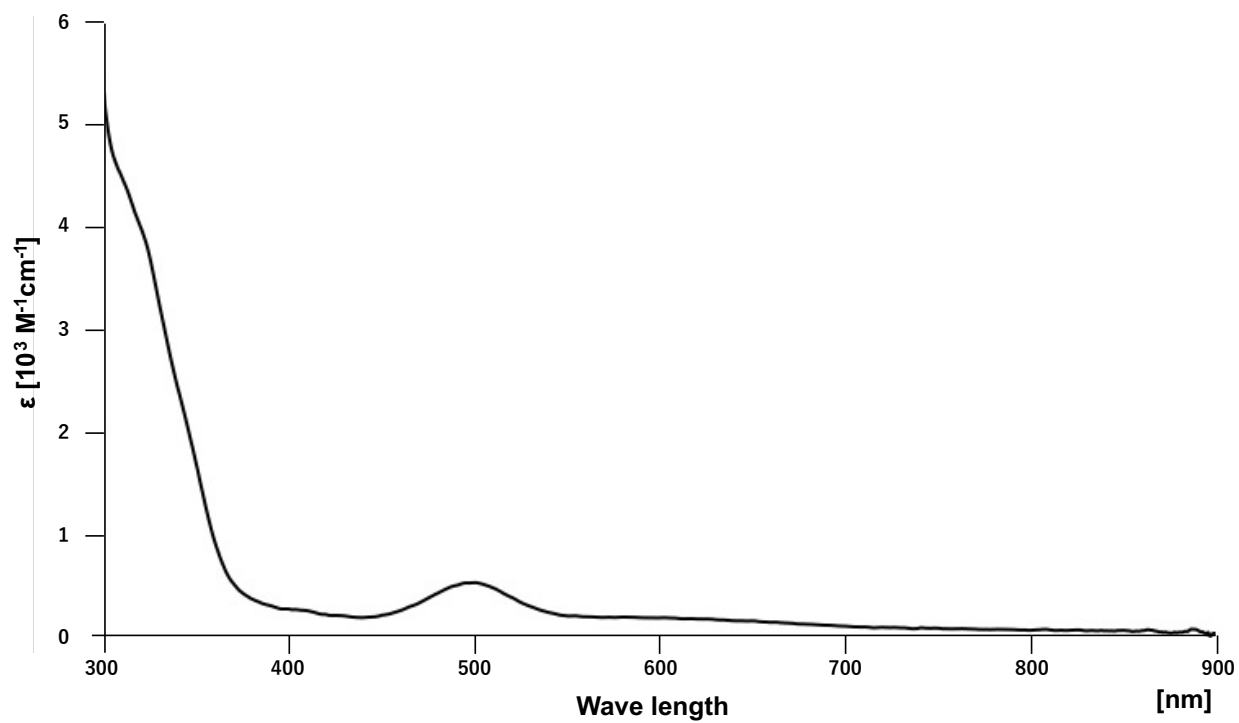

Figure S6

UV-vis absorption spectrum of  $[\text{Os}^{\text{III}}\text{Cl}_2(\text{P}^n\text{Pr}_3)_2(\text{Agbim})]_2(5)$  in  $\text{CH}_2\text{Cl}_2$

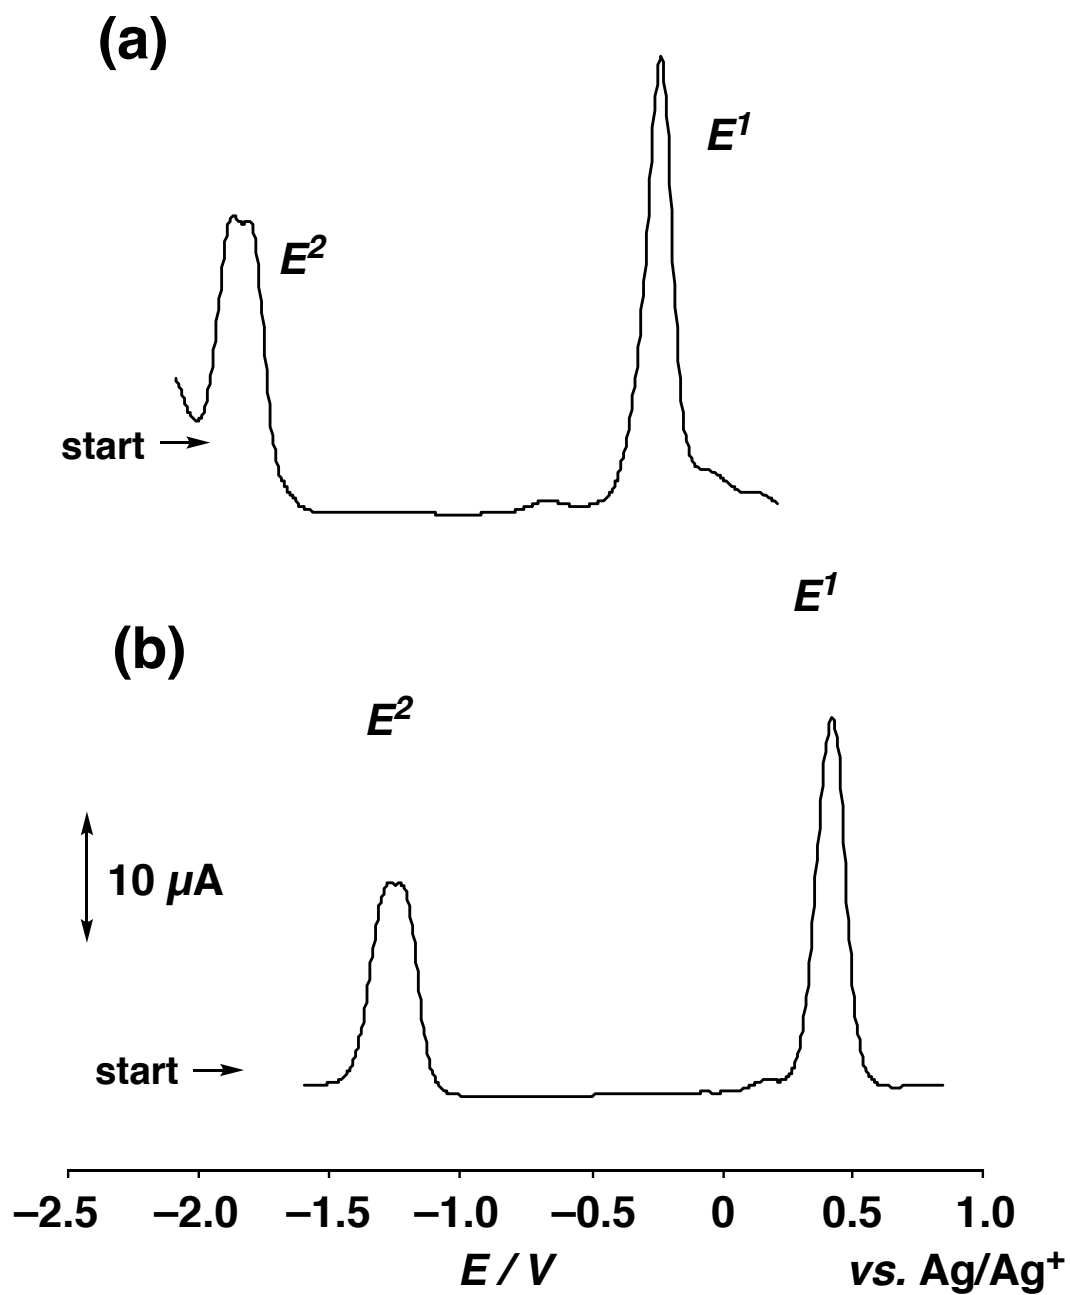

Figure S7

The results of DPV measurements (a)  $[\text{Re}^{\text{III}}\text{Cl}_2(\text{P}^n\text{Pr}_3)_2(\text{Agbim})]_2(4)$   
(b)  $[\text{Os}^{\text{III}}\text{Cl}_2(\text{P}^n\text{Pr}_3)_2(\text{Agbim})]_2(5)$  in  $\text{CH}_2\text{Cl}_2$



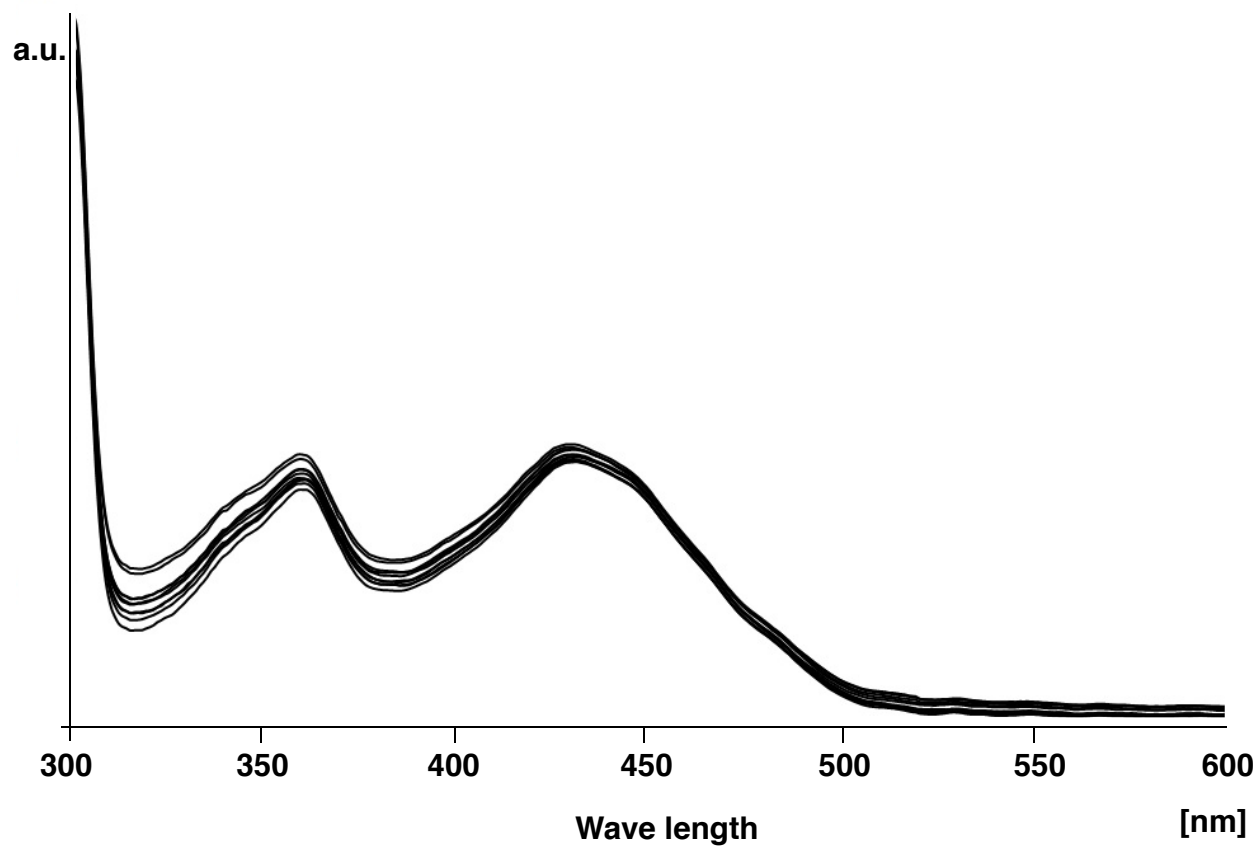

**Figure S8**

**UV-*vis* absorption spectra at pH = 2.37~4.22 of  $[\text{Re}^{\text{III}}\text{Cl}_2(\text{P}^n\text{Pr}_3)_2(\text{H}_2\text{bim})]\text{Cl}$  for Pourbaix Diagram.**

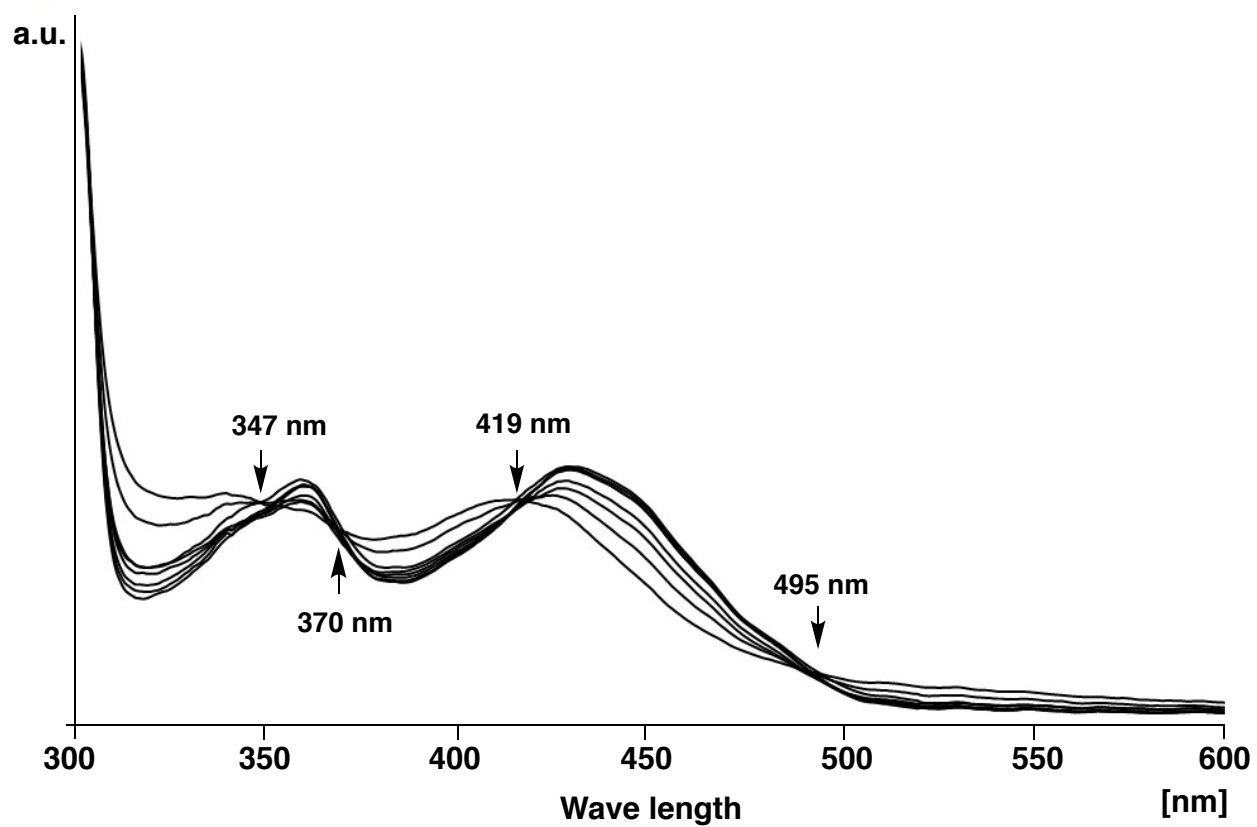

**Figure S9**

**UV-*vis* absorption spectra at pH = 4.40~6.22 of  $[\text{Re}^{\text{III}}\text{Cl}_2(\text{P}^n\text{Pr}_3)_2(\text{H}_2\text{bim})]\text{Cl}$  for Pourbaix Diagram. Four isosbestic points were observed at 347 nm, 370 nm, 419 nm, and 495 nm.**

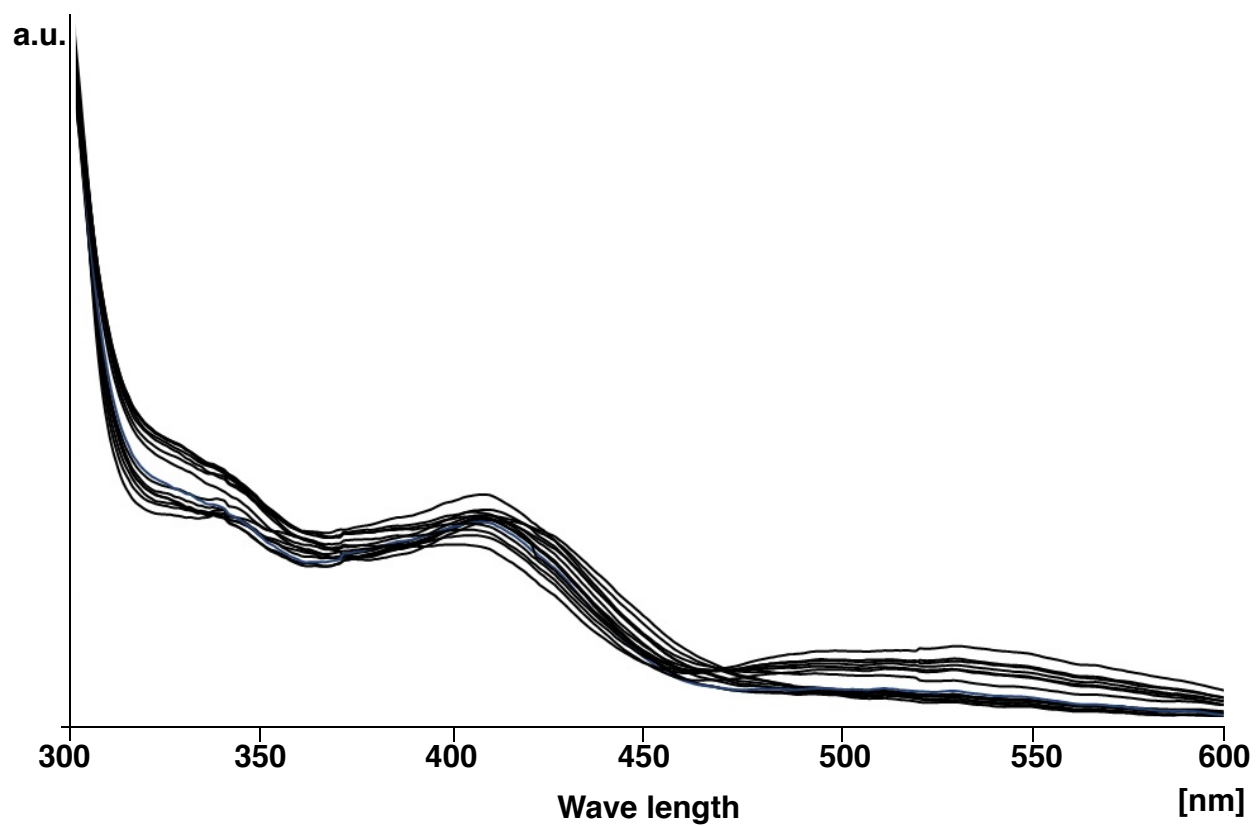

**Figure S10**

**UV-*vis* absorption spectra at pH = 6.39~9.45 of  $[\text{Re}^{\text{III}}\text{Cl}_2(\text{P}^n\text{Pr}_3)_2(\text{H}_2\text{bim})]\text{Cl}$  for Pourbaix Diagram.**

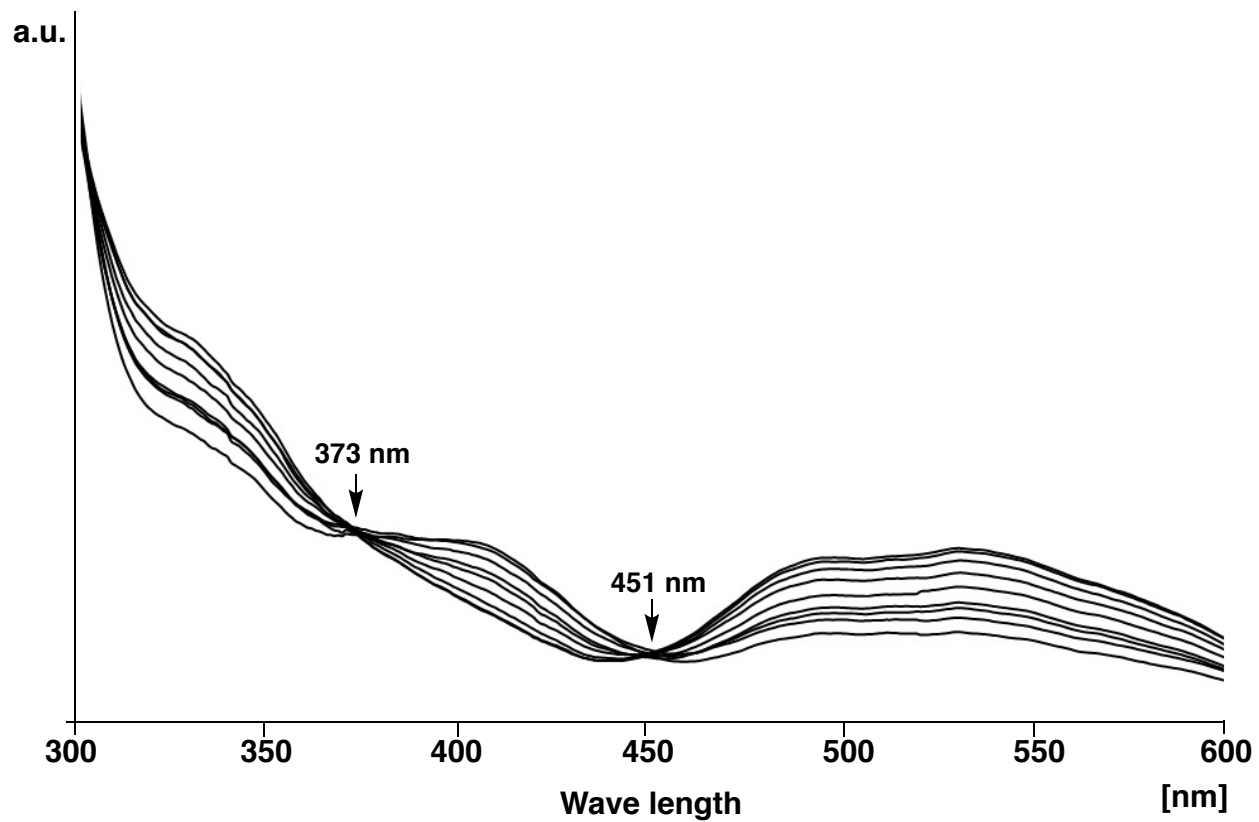

**Figure S11**

**UV-*vis* absorption spectra at pH = 9.61 ~ 11.43 of  $[\text{Re}^{\text{III}}\text{Cl}_2(\text{P}^n\text{Pr}_3)_2(\text{H}_2\text{bim})]\text{Cl}$  for Pourbaix Diagram. Two isosbestic points were observed at 373 nm, and 451 nm.**

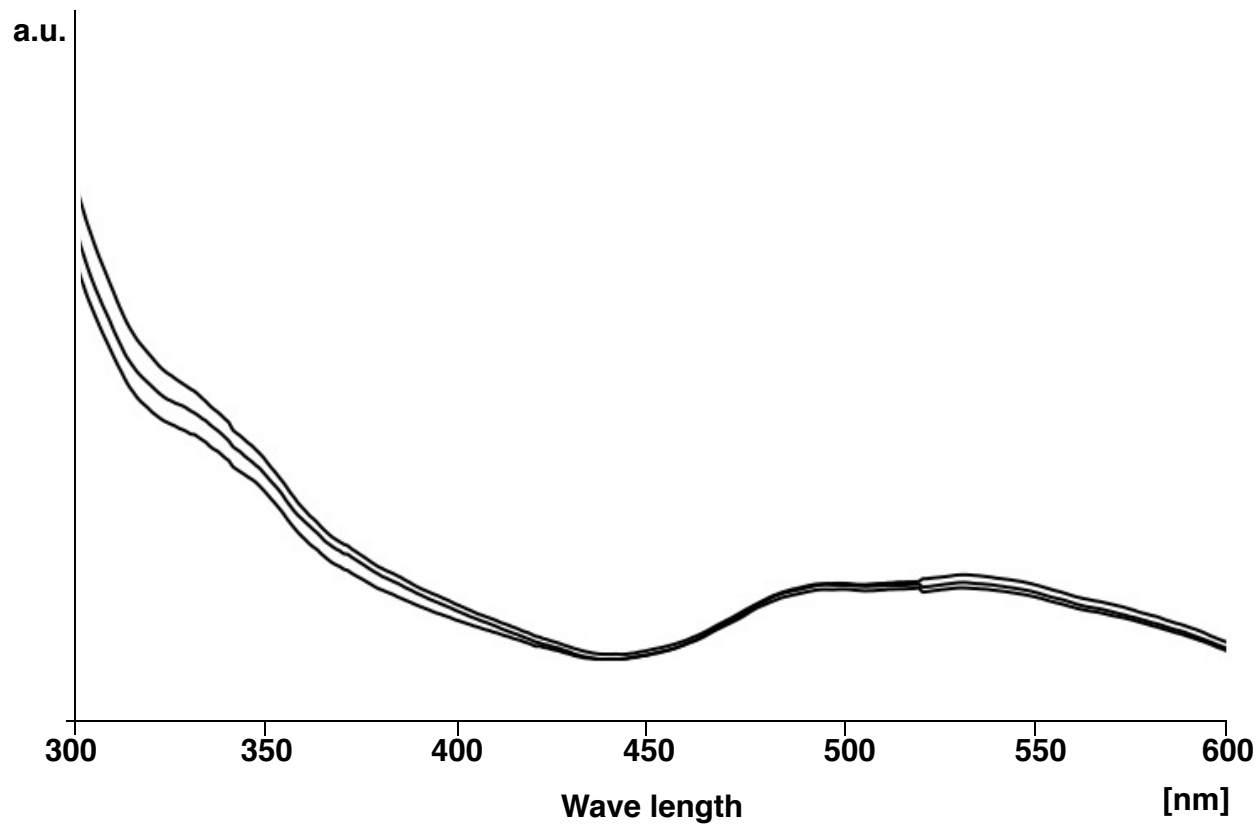

**Figure S12**

**UV-vis absorption spectra at pH = 11.60~12.00 of  $[\text{Re}^{\text{III}}\text{Cl}_2(\text{P}^n\text{Pr}_3)_2(\text{H}_2\text{bim})]\text{Cl}$  for Pourbaix Diagram.**

Table S1. Bond distances (Å) and angles (°) around metal coordination of  $[\text{Re}^{\text{III}}\text{Cl}_2(\text{P}^n\text{Pr}_3)_2(\text{Hbim})]_2(\mathbf{2})$

|                   |           |                  |            |
|-------------------|-----------|------------------|------------|
| Re(1)–Cl(1)       | 2.3742(9) | Re(1)–P(2)       | 2.4566(10) |
| Re(1)–Cl(2)       | 2.3833(9) | Re(1)–N(1)       | 2.111(3)   |
| Re(1)–P(1)        | 2.4638(9) | Re(1)–N(3)       | 2.091(3)   |
| Cl(1)–Re(1)–Cl(2) | 100.94(3) | Cl(2)–Re(1)–N(3) | 92.06(8)   |
| Cl(1)–Re(1)–P(1)  | 89.98(3)  | P(1)–Re(1)–P(2)  | 178.38(3)  |
| Cl(1)–Re(1)–P(2)  | 91.28(3)  | P(1)–Re(1)–N(1)  | 87.42(8)   |
| Cl(1)–Re(1)–N(1)  | 91.26(8)  | P(1)–Re(1)–N(3)  | 91.93(8)   |
| Cl(1)–Re(1)–N(3)  | 166.88(8) | P(2)–Re(1)–N(1)  | 93.57(8)   |
| Cl(2)–Re(1)–P(1)  | 89.31(3)  | P(2)–Re(1)–N(3)  | 87.07(8)   |
| Cl(2)–Re(1)–P(2)  | 89.46(3)  | N(1)–Re(1)–N(3)  | 75.87(10)  |
| Cl(2)–Re(1)–N(1)  | 167.37(8) |                  |            |

Table S2. Bond distances (Å) and angles (°) around metal coordination of  $[\text{Os}^{\text{III}}\text{Cl}_2(\text{P}^n\text{Pr}_3)_2(\text{Hbim})]_2(\mathbf{3})$

|                   |            |                   |           |
|-------------------|------------|-------------------|-----------|
| Os(1)–Cl(1)       | 2.360(2)   | Os(4)–Cl(7)       | 2.363(2)  |
| Os(1)–Cl(2)       | 2.367(2)   | Os(4)–Cl(8)       | 2.370(2)  |
| Os(1)–P(1)        | 2.396(2)   | Os(4)–P(7)        | 2.386(3)  |
| Os(1)–P(2)        | 2.396(2)   | Os(4)–P(8)        | 2.402(2)  |
| Os(1)–N(1)        | 2.067(7)   | Os(4)–N(13)       | 2.069(7)  |
| Os(1)–N(3)        | 2.078(6)   | Os(4)–N(15)       | 2.089(7)  |
| Os(2)–Cl(3)       | 2.366(2)   | Os(5)–Cl(9)       | 2.368(2)  |
| Os(2)–Cl(4)       | 2.365(3)   | Os(5)–Cl(10)      | 2.352(3)  |
| Os(2)–P(3)        | 2.385(3)   | Os(5)–P(9)        | 2.396(3)  |
| Os(2)–P(4)        | 2.402(3)   | Os(5)–P(10)       | 2.392(3)  |
| Os(2)–N(5)        | 2.064(7)   | Os(5)–N(17)       | 2.072(8)  |
| Os(2)–N(7)        | 2.082(7)   | Os(5)–N(19)       | 2.070(7)  |
| Os(3)–Cl(5)       | 2.366(2)   | Os(6)–Cl(11)      | 2.362(2)  |
| Os(3)–Cl(6)       | 2.362(3)   | Os(6)–Cl(12)      | 2.376(2)  |
| Os(3)–P(5)        | 2.387(2)   | Os(6)–P(11)       | 2.384(3)  |
| Os(3)–P(6)        | 2.382(3)   | Os(6)–P(12)       | 2.393(3)  |
| Os(3)–N(9)        | 2.070(7)   | Os(6)–N(21)       | 2.071(7)  |
| Os(3)–N(11)       | 2.080(7)   | Os(6)–N(23)       | 2.074(7)  |
| Cl(1)–Os(1)–Cl(2) | 96.19(8)   | P(2)–Os(1)–N(1)   | 91.0(2)   |
| Cl(1)–Os(1)–P(1)  | 90.30(9)   | P(2)–Os(1)–N(3)   | 88.9(2)   |
| Cl(1)–Os(1)–P(2)  | 89.24(9)   | N(1)–Os(1)–N(3)   | 77.2(3)   |
| Cl(1)–Os(1)–N(1)  | 171.60(18) | Cl(3)–Os(2)–Cl(4) | 99.85(9)  |
| Cl(1)–Os(1)–N(3)  | 94.4(2)    | Cl(3)–Os(2)–P(3)  | 86.44(10) |
| Cl(2)–Os(1)–P(1)  | 89.48(8)   | Cl(3)–Os(2)–P(4)  | 89.68(9)  |
| Cl(2)–Os(1)–P(2)  | 89.39(8)   | Cl(3)–Os(2)–N(5)  | 90.3(2)   |
| Cl(2)–Os(1)–N(1)  | 92.21(18)  | Cl(3)–Os(2)–N(7)  | 167.5(2)  |
| Cl(2)–Os(1)–N(3)  | 169.2(2)   | Cl(4)–Os(2)–P(3)  | 89.38(10) |
| P(1)–Os(1)–P(2)   | 178.73(8)  | Cl(4)–Os(2)–P(4)  | 88.77(10) |
| P(1)–Os(1)–N(1)   | 89.6(2)    | Cl(4)–Os(2)–N(5)  | 169.9(2)  |
| P(1)–Os(1)–N(3)   | 92.4(2)    | Cl(4)–Os(2)–N(7)  | 92.7(2)   |

Table S2. Bond distances (Å) and angles (°) around metal coordination of  $[\text{Os}^{\text{III}}\text{Cl}_2(\text{P}^2\text{Pr}_3)_2(\text{Hbim})]_2(\mathbf{3})$   
(continued 1)

|                   |            |                     |            |
|-------------------|------------|---------------------|------------|
| P(3)–Os(2)–P(4)   | 175.36(9)  | P(7)–Os(4)–N(13)    | 90.9(2)    |
| P(3)–Os(2)–N(5)   | 91.7(2)    | P(7)–Os(4)–N(15)    | 92.71(19)  |
| P(3)–Os(2)–N(7)   | 93.3(2)    | P(8)–Os(4)–N(13)    | 91.5(2)    |
| P(4)–Os(2)–N(5)   | 90.8(2)    | P(8)–Os(4)–N(15)    | 92.54(19)  |
| P(4)–Os(2)–N(7)   | 91.1(2)    | N(13)–Os(4)–N(15)   | 76.7(3)    |
| N(5)–Os(2)–N(7)   | 77.2(3)    | Cl(9)–Os(5)–Cl(10)  | 98.00(10)  |
| Cl(5)–Os(3)–Cl(6) | 97.90(9)   | Cl(9)–Os(5)–P(9)    | 88.62(10)  |
| Cl(5)–Os(3)–P(5)  | 87.88(8)   | Cl(9)–Os(5)–P(10)   | 88.87(9)   |
| Cl(5)–Os(3)–P(6)  | 90.31(10)  | Cl(9)–Os(5)–N(17)   | 90.7(2)    |
| Cl(5)–Os(3)–N(9)  | 91.38(18)  | Cl(9)–Os(5)–N(19)   | 167.0(2)   |
| Cl(5)–Os(3)–N(11) | 167.5(2)   | Cl(10)–Os(5)–P(9)   | 87.94(11)  |
| Cl(6)–Os(3)–P(5)  | 86.61(9)   | Cl(10)–Os(5)–P(10)  | 87.48(10)  |
| Cl(6)–Os(3)–P(6)  | 89.06(10)  | Cl(10)–Os(5)–N(17)  | 171.0(2)   |
| Cl(6)–Os(3)–N(9)  | 170.25(18) | Cl(10)–Os(5)–N(19)  | 94.7(2)    |
| Cl(6)–Os(3)–N(11) | 94.6(2)    | P(9)–Os(5)–P(10)    | 174.43(10) |
| P(5)–Os(3)–P(6)   | 175.03(9)  | P(9)–Os(5)–N(17)    | 90.0(2)    |
| P(5)–Os(3)–N(9)   | 90.80(18)  | P(9)–Os(5)–N(19)    | 94.6(2)    |
| P(5)–Os(3)–N(11)  | 93.8(2)    | P(10)–Os(5)–N(17)   | 95.0(2)    |
| P(6)–Os(3)–N(9)   | 93.87(19)  | P(10)–Os(5)–N(19)   | 89.0(2)    |
| P(6)–Os(3)–N(11)  | 88.9(2)    | N(17)–Os(5)–N(19)   | 76.7(3)    |
| N(9)–Os(3)–N(11)  | 76.2(3)    | Cl(11)–Os(6)–Cl(12) | 96.93(9)   |
| Cl(7)–Os(4)–Cl(8) | 97.71(9)   | Cl(11)–Os(6)–P(11)  | 89.21(9)   |
| Cl(7)–Os(4)–P(7)  | 86.62(9)   | Cl(11)–Os(6)–P(12)  | 86.86(9)   |
| Cl(7)–Os(4)–P(8)  | 88.45(8)   | Cl(11)–Os(6)–N(21)  | 93.9(2)    |
| Cl(7)–Os(4)–N(13) | 92.5(2)    | Cl(11)–Os(6)–N(23)  | 170.71(19) |
| Cl(7)–Os(4)–N(15) | 169.09(18) | Cl(12)–Os(6)–P(11)  | 87.27(9)   |
| Cl(8)–Os(4)–P(7)  | 90.26(9)   | Cl(12)–Os(6)–P(12)  | 90.14(8)   |
| Cl(8)–Os(4)–P(8)  | 88.24(9)   | Cl(12)–Os(6)–N(21)  | 169.1(2)   |
| Cl(8)–Os(4)–N(13) | 169.8(2)   | Cl(12)–Os(6)–N(23)  | 92.33(19)  |
| Cl(8)–Os(4)–N(15) | 93.19(18)  | P(11)–Os(6)–P(12)   | 175.00(9)  |
| P(7)–Os(4)–P(8)   | 174.61(10) | P(11)–Os(6)–N(21)   | 91.3(2)    |



Table S2. Bond distances (Å) and angles (°) around metal coordination of  $[\text{Os}^{\text{III}}\text{Cl}_2(\text{P}^n\text{Pr}_3)_2(\text{Hbim})]_2(\mathbf{3})$   
(continued 2)

|                   |         |                   |         |
|-------------------|---------|-------------------|---------|
| P(11)–Os(6)–N(23) | 92.0(2) | P(12)–Os(6)–N(23) | 92.4(2) |
| P(12)–Os(6)–N(21) | 92.0(2) | N(21)–Os(6)–N(23) | 76.9(3) |

Table S3 Bond distances (Å) and angles (°) around metal coordination of  $[\text{Re}^{\text{III}}\text{Cl}_2(\text{P}^n\text{Pr}_3)_2(\text{Agbim})]_2(\mathbf{4})$ 

|                   |            |                   |            |
|-------------------|------------|-------------------|------------|
| Re(1)–Cl(1)       | 2.369(5)   | Re(3)–N(11)       | 2.095(12)  |
| Re(1)–Cl(2)       | 2.399(5)   | Re(4)–Cl(7)       | 2.372(4)   |
| Re(1)–P(1)        | 2.459(6)   | Re(4)–Cl(8)       | 2.390(4)   |
| Re(1)–P(2)        | 2.440(6)   | Re(4)–P(7)        | 2.482(6)   |
| Re(1)–N(1)        | 2.056(16)  | Re(4)–P(8)        | 2.423(6)   |
| Re(1)–N(3)        | 2.087(14)  | Re(4)–N(13)       | 2.093(12)  |
| Re(2)–Cl(3)       | 2.393(4)   | Re(4)–N(15)       | 2.051(13)  |
| Re(2)–Cl(4)       | 2.367(5)   | Ag(1)–Ag(2)       | 2.9855(19) |
| Re(2)–P(3)        | 2.459(6)   | Ag(1)–N(2)        | 2.037(12)  |
| Re(2)–P(4)        | 2.425(6)   | Ag(1)–N(6)        | 2.083(15)  |
| Re(2)–N(5)        | 2.100(13)  | Ag(2)–N(4)        | 2.089(13)  |
| Re(2)–N(7)        | 2.112(12)  | Ag(2)–N(8)        | 2.069(13)  |
| Re(3)–Cl(5)       | 2.389(4)   | Ag(3)–Ag(4)       | 2.9815(18) |
| Re(3)–Cl(6)       | 2.362(5)   | Ag(3)–N(10)       | 2.083(12)  |
| Re(3)–P(5)        | 2.448(5)   | Ag(3)–N(14)       | 2.095(13)  |
| Re(3)–P(6)        | 2.451(5)   | Ag(4)–N(12)       | 2.116(14)  |
| Re(3)–N(9)        | 2.101(12)  | Ag(4)–N(16)       | 2.084(13)  |
| Cl(1)–Re(1)–Cl(2) | 100.76(17) | P(1)–Re(1)–N(3)   | 86.2(4)    |
| Cl(1)–Re(1)–P(1)  | 90.1(2)    | P(2)–Re(1)–N(1)   | 87.8(5)    |
| Cl(1)–Re(1)–P(2)  | 89.8(2)    | P(2)–Re(1)–N(3)   | 94.2(4)    |
| Cl(1)–Re(1)–N(1)  | 92.4(5)    | N(1)–Re(1)–N(3)   | 76.8(6)    |
| Cl(1)–Re(1)–N(3)  | 168.3(4)   | Cl(3)–Re(2)–Cl(4) | 100.59(17) |
| Cl(2)–Re(1)–P(1)  | 89.96(17)  | Cl(3)–Re(2)–P(3)  | 88.87(19)  |
| Cl(2)–Re(1)–P(2)  | 88.81(19)  | Cl(3)–Re(2)–P(4)  | 90.92(18)  |
| Cl(2)–Re(1)–N(1)  | 166.4(5)   | Cl(3)–Re(2)–N(5)  | 90.7(4)    |
| Cl(2)–Re(1)–N(3)  | 90.4(4)    | Cl(3)–Re(2)–N(7)  | 166.8(4)   |
| P(1)–Re(1)–P(2)   | 178.70(19) | Cl(4)–Re(2)–P(3)  | 92.8(2)    |
| P(1)–Re(1)–N(1)   | 93.5(5)    | Cl(4)–Re(2)–P(4)  | 88.3(2)    |

Table S3 Bond distances (Å) and angles (°) around metal coordination of [Re<sup>III</sup>Cl<sub>2</sub>(P<sup>η</sup>Pr<sub>3</sub>)<sub>2</sub>(Agbim)]<sub>2</sub>(4)  
(continued 1)

|                   |            |                   |           |
|-------------------|------------|-------------------|-----------|
| Cl(4)–Re(2)–N(5)  | 168.4(4)   | P(5)–Re(3)–N(11)  | 88.5(4)   |
| Cl(4)–Re(2)–N(7)  | 92.5(4)    | P(6)–Re(3)–N(9)   | 89.3(4)   |
| P(3)–Re(2)–P(4)   | 178.9(2)   | P(6)–Re(3)–N(11)  | 92.9(4)   |
| P(3)–Re(2)–N(5)   | 90.0(5)    | N(9)–Re(3)–N(11)  | 74.8(5)   |
| P(3)–Re(2)–N(7)   | 88.6(3)    | Cl(7)–Re(4)–Cl(8) | 98.13(16) |
| P(4)–Re(2)–N(5)   | 88.9(5)    | Cl(7)–Re(4)–P(7)  | 88.1(2)   |
| P(4)–Re(2)–N(7)   | 91.3(3)    | Cl(7)–Re(4)–P(8)  | 90.57(17) |
| N(5)–Re(2)–N(7)   | 76.4(5)    | Cl(7)–Re(4)–N(13) | 94.1(4)   |
| Cl(5)–Re(3)–Cl(6) | 101.71(16) | Cl(7)–Re(4)–N(15) | 169.5(4)  |
| Cl(5)–Re(3)–P(5)  | 88.92(18)  | Cl(8)–Re(4)–P(7)  | 87.1(2)   |
| Cl(5)–Re(3)–P(6)  | 89.70(16)  | Cl(8)–Re(4)–P(8)  | 93.6(2)   |
| Cl(5)–Re(3)–N(9)  | 90.9(3)    | Cl(8)–Re(4)–N(13) | 167.4(4)  |
| Cl(5)–Re(3)–N(11) | 165.4(4)   | Cl(8)–Re(4)–N(15) | 92.3(4)   |
| Cl(6)–Re(3)–P(5)  | 90.62(19)  | P(7)–Re(4)–P(8)   | 178.6(2)  |
| Cl(6)–Re(3)–P(6)  | 89.29(17)  | P(7)–Re(4)–N(13)  | 90.3(4)   |
| Cl(6)–Re(3)–N(9)  | 167.3(4)   | P(7)–Re(4)–N(15)  | 91.2(5)   |
| Cl(6)–Re(3)–N(11) | 92.7(4)    | P(8)–Re(4)–N(13)  | 89.2(4)   |
| P(5)–Re(3)–P(6)   | 178.56(19) | P(8)–Re(4)–N(15)  | 90.0(5)   |
| P(5)–Re(3)–N(9)   | 91.1(4)    | N(13)–Re(4)–N(15) | 75.4(5)   |

Table S4. Bond distances (Å) and angles (°) around metal coordination of  $[\text{Os}^{\text{III}}\text{Cl}_2(\text{P}^n\text{Pr}_3)_2(\text{Agbim})]_2(\mathbf{5})$ 

|                   |            |                   |            |
|-------------------|------------|-------------------|------------|
| Os(1)–Cl(1)       | 2.3749(19) | Os(3)–N(11)       | 2.082(7)   |
| Os(1)–Cl(2)       | 2.370(2)   | Os(4)–Cl(7)       | 2.3729(19) |
| Os(1)–P(1)        | 2.379(2)   | Os(4)–Cl(8)       | 2.370(2)   |
| Os(1)–P(2)        | 2.379(2)   | Os(4)–P(7)        | 2.369(3)   |
| Os(1)–N(1)        | 2.064(6)   | Os(4)–P(8)        | 2.365(3)   |
| Os(1)–N(3)        | 2.055(6)   | Os(4)–N(13)       | 2.079(6)   |
| Os(2)–Cl(3)       | 2.370(2)   | Os(4)–N(15)       | 2.071(6)   |
| Os(2)–Cl(4)       | 2.382(2)   | Ag(1)–Ag(2)       | 2.9712(9)  |
| Os(2)–P(3)        | 2.383(2)   | Ag(1)–N(2)        | 2.075(7)   |
| Os(2)–P(4)        | 2.377(3)   | Ag(1)–N(6)        | 2.073(7)   |
| Os(2)–N(5)        | 2.062(6)   | Ag(2)–N(4)        | 2.071(7)   |
| Os(2)–N(7)        | 2.064(6)   | Ag(2)–N(8)        | 2.075(6)   |
| Os(3)–Cl(5)       | 2.368(2)   | Ag(3)–Ag(4)       | 2.9710(10) |
| Os(3)–Cl(6)       | 2.3800(19) | Ag(3)–N(10)       | 2.086(6)   |
| Os(3)–P(5)        | 2.383(2)   | Ag(3)–N(14)       | 2.071(6)   |
| Os(3)–P(6)        | 2.384(2)   | Ag(4)–N(12)       | 2.086(6)   |
| Os(3)–N(9)        | 2.061(6)   | Ag(4)–N(16)       | 2.085(7)   |
| Cl(1)–Os(1)–Cl(2) | 96.54(7)   | P(1)–Os(1)–N(3)   | 88.7(2)    |
| Cl(1)–Os(1)–P(1)  | 89.38(8)   | P(2)–Os(1)–N(1)   | 90.63(19)  |
| Cl(1)–Os(1)–P(2)  | 89.82(8)   | P(2)–Os(1)–N(3)   | 92.1(2)    |
| Cl(1)–Os(1)–N(1)  | 93.21(19)  | N(1)–Os(1)–N(3)   | 76.9(3)    |
| Cl(1)–Os(1)–N(3)  | 169.96(19) | Cl(3)–Os(2)–Cl(4) | 96.18(7)   |
| Cl(2)–Os(1)–P(1)  | 90.65(8)   | Cl(3)–Os(2)–P(3)  | 91.15(8)   |
| Cl(2)–Os(1)–P(2)  | 89.26(9)   | Cl(3)–Os(2)–P(4)  | 91.04(9)   |
| Cl(2)–Os(1)–N(1)  | 170.25(19) | Cl(3)–Os(2)–N(5)  | 93.99(18)  |
| Cl(2)–Os(1)–N(3)  | 93.34(19)  | Cl(3)–Os(2)–N(7)  | 171.02(19) |
| P(1)–Os(1)–P(2)   | 179.17(9)  | Cl(4)–Os(2)–P(3)  | 89.36(8)   |
| P(1)–Os(1)–N(1)   | 89.60(19)  | Cl(4)–Os(2)–P(4)  | 89.79(8)   |

Table S4 Bond distances (Å) and angles (°) around metal coordination of [Os<sup>III</sup>Cl<sub>2</sub>(P<sup>η</sup>Pr<sub>3</sub>)<sub>2</sub>(Agbim)]<sub>2</sub>(**5**)  
(continued 1)

|                   |            |                   |            |
|-------------------|------------|-------------------|------------|
| Cl(4)–Os(2)–N(5)  | 169.70(19) | P(5)–Os(3)–N(11)  | 89.6(2)    |
| Cl(4)–Os(2)–N(7)  | 92.78(18)  | P(6)–Os(3)–N(9)   | 91.2(2)    |
| P(3)–Os(2)–P(4)   | 177.72(9)  | P(6)–Os(3)–N(11)  | 89.0(2)    |
| P(3)–Os(2)–N(5)   | 88.8(2)    | N(9)–Os(3)–N(11)  | 76.8(3)    |
| P(3)–Os(2)–N(7)   | 89.5(2)    | Cl(7)–Os(4)–Cl(8) | 97.86(7)   |
| P(4)–Os(2)–N(5)   | 91.6(2)    | Cl(7)–Os(4)–P(7)  | 89.27(8)   |
| P(4)–Os(2)–N(7)   | 88.5(2)    | Cl(7)–Os(4)–P(8)  | 89.64(8)   |
| N(5)–Os(2)–N(7)   | 77.1(3)    | Cl(7)–Os(4)–N(13) | 92.09(18)  |
| Cl(5)–Os(3)–Cl(6) | 96.87(7)   | Cl(7)–Os(4)–N(15) | 168.5(2)   |
| Cl(5)–Os(3)–P(5)  | 90.91(8)   | Cl(8)–Os(4)–P(7)  | 88.89(9)   |
| Cl(5)–Os(3)–P(6)  | 90.53(9)   | Cl(8)–Os(4)–P(8)  | 88.92(11)  |
| Cl(5)–Os(3)–N(9)  | 93.42(19)  | Cl(8)–Os(4)–N(13) | 170.05(18) |
| Cl(5)–Os(3)–N(11) | 170.22(19) | Cl(8)–Os(4)–N(15) | 93.5(2)    |
| Cl(6)–Os(3)–P(5)  | 89.45(8)   | P(7)–Os(4)–P(8)   | 177.40(10) |
| Cl(6)–Os(3)–P(6)  | 90.27(8)   | P(7)–Os(4)–N(13)  | 91.6(2)    |
| Cl(6)–Os(3)–N(9)  | 169.58(19) | P(7)–Os(4)–N(15)  | 89.2(2)    |
| Cl(6)–Os(3)–N(11) | 92.90(18)  | P(8)–Os(4)–N(13)  | 90.8(2)    |
| P(5)–Os(3)–P(6)   | 178.56(9)  | P(8)–Os(4)–N(15)  | 92.3(2)    |
| P(5)–Os(3)–N(9)   | 88.8(2)    | N(13)–Os(4)–N(15) | 76.6(3)    |

Table S5. Redox potential at each pH of  $[\text{Re}^{\text{III}}\text{Cl}_2(\text{P}^n\text{Pr}_3)_2(\text{H}_2\text{bim})]\text{Cl}$  for Pourbaix Diagram

| pH   | $E_c(\text{Re}^{\text{II}}/\text{Re}^{\text{III}})$ | $E_c(\text{Re}^{\text{III}}/\text{Re}^{\text{IV}})$ | $E_a(\text{Re}^{\text{III}}/\text{Re}^{\text{IV}})$ | $E_{1/2}(\text{Re}^{\text{III}}/\text{Re}^{\text{IV}})$ |
|------|-----------------------------------------------------|-----------------------------------------------------|-----------------------------------------------------|---------------------------------------------------------|
| 2.4  | -0.93                                               | 0.314                                               | 0.501                                               | 0.408                                                   |
| 2.5  | -0.928                                              | 0.306                                               | 0.497                                               | 0.402                                                   |
| 2.61 | -0.927                                              | 0.301                                               | 0.49                                                | 0.396                                                   |
| 2.72 | -0.926                                              | 0.293                                               | 0.489                                               | 0.391                                                   |
| 2.8  | -0.922                                              | 0.287                                               | 0.484                                               | 0.386                                                   |
| 2.9  | -0.919                                              | 0.283                                               | 0.472                                               | 0.378                                                   |
| 3    | -0.918                                              | 0.281                                               | 0.465                                               | 0.373                                                   |
| 3.1  | -0.91                                               | 0.276                                               | 0.461                                               | 0.369                                                   |
| 3.19 | -0.909                                              | 0.275                                               | 0.445                                               | 0.36                                                    |
| 3.29 | -0.907                                              | 0.272                                               | 0.438                                               | 0.355                                                   |
| 3.39 | -0.899                                              | 0.269                                               | 0.427                                               | 0.348                                                   |
| 3.49 | -0.906                                              | 0.261                                               | 0.419                                               | 0.34                                                    |
| 3.6  | -0.899                                              | 0.254                                               | 0.422                                               | 0.338                                                   |
| 3.71 | -0.901                                              | 0.25                                                | 0.414                                               | 0.332                                                   |
| 3.79 | -0.895                                              | 0.248                                               | 0.405                                               | 0.327                                                   |
| 3.99 | -0.9                                                | 0.241                                               | 0.394                                               | 0.318                                                   |
| 4.09 | -0.893                                              | 0.236                                               | 0.393                                               | 0.315                                                   |
| 4.22 | -0.898                                              | 0.227                                               | 0.384                                               | 0.306                                                   |
| 4.32 | -0.893                                              | 0.22                                                | 0.377                                               | 0.299                                                   |
| 4.40 | -0.897                                              | 0.214                                               | 0.369                                               | 0.292                                                   |
| 4.53 | -0.891                                              | 0.209                                               | 0.361                                               | 0.285                                                   |
| 4.62 | -0.894                                              | 0.205                                               | 0.361                                               | 0.283                                                   |
| 4.71 | -0.891                                              | 0.198                                               | 0.351                                               | 0.275                                                   |
| 4.86 | -0.894                                              | 0.194                                               | 0.344                                               | 0.269                                                   |
| 4.99 | -0.89                                               | 0.19                                                | 0.34                                                | 0.265                                                   |
| 5.1  | -0.895                                              | 0.184                                               | 0.33                                                | 0.257                                                   |

[V] (vs.  $\text{Fc}/\text{Fc}^+$ )

Table S5 Redox potential at each pH of  $[\text{Re}^{\text{III}}\text{Cl}_2(\text{P}^n\text{Pr}_3)_2(\text{H}_2\text{bim})]\text{Cl}$  for Pourbaix Diagram (continued 1)

| pH   | $E_c(\text{Re}^{\text{II}}/\text{Re}^{\text{III}})$ | $E_c(\text{Re}^{\text{III}}/\text{Re}^{\text{IV}})$ | $E_a(\text{Re}^{\text{III}}/\text{Re}^{\text{IV}})$ | $E_{1/2}(\text{Re}^{\text{III}}/\text{Re}^{\text{IV}})$ |
|------|-----------------------------------------------------|-----------------------------------------------------|-----------------------------------------------------|---------------------------------------------------------|
| 5.29 | -0.898                                              | 0.176                                               | 0.321                                               | 0.249                                                   |
| 5.39 | -0.898                                              | 0.171                                               | 0.309                                               | 0.24                                                    |
| 5.49 | -0.905                                              | 0.166                                               | 0.304                                               | 0.235                                                   |
| 5.59 | -0.922                                              | 0.16                                                | 0.333                                               | 0.247                                                   |
| 5.7  | -0.913                                              | 0.162                                               | 0.296                                               | 0.229                                                   |
| 5.79 | -0.928                                              | 0.157                                               | 0.297                                               | 0.227                                                   |
| 5.9  | -0.921                                              | 0.148                                               | 0.265                                               | 0.207                                                   |
| 6.01 | -0.947                                              | 0.152                                               | 0.243                                               | 0.198                                                   |
| 6.13 | -0.931                                              | 0.147                                               | 0.238                                               | 0.193                                                   |
| 6.23 | -0.957                                              | 0.14                                                | 0.237                                               | 0.189                                                   |
| 6.32 | -0.945                                              | 0.135                                               | 0.237                                               | 0.186                                                   |
| 6.4  | -1                                                  | 0.128                                               | 0.227                                               | 0.178                                                   |
| 6.51 | -0.965                                              | 0.122                                               | 0.225                                               | 0.174                                                   |
| 6.62 | -0.983                                              | 0.117                                               | 0.199                                               | 0.158                                                   |
| 6.72 | -0.972                                              | 0.112                                               | 0.196                                               | 0.154                                                   |
| 6.8  | -0.983                                              | 0.107                                               | 0.193                                               | 0.15                                                    |
| 6.94 | -0.984                                              | 0.101                                               | 0.189                                               | 0.145                                                   |
| 7    | -0.99                                               | 0.091                                               | 0.184                                               | 0.138                                                   |
| 7.12 | -0.994                                              | 0.09                                                | 0.179                                               | 0.135                                                   |
| 7.21 | -1.006                                              | 0.085                                               | 0.175                                               | 0.13                                                    |
| 7.3  | -1.007                                              | 0.078                                               | 0.171                                               | 0.125                                                   |
| 7.41 | -1.014                                              | 0.071                                               | 0.165                                               | 0.118                                                   |
| 7.5  | -1.021                                              | 0.066                                               | 0.159                                               | 0.113                                                   |
| 7.62 | -1.028                                              | 0.06                                                | 0.153                                               | 0.107                                                   |
| 7.7  | -1.036                                              | 0.052                                               | 0.151                                               | 0.102                                                   |

[V] (vs.  $\text{Fc}/\text{Fc}^+$ )

Table S5 Redox potential at each pH of  $[\text{Re}^{\text{III}}\text{Cl}_2(\text{P}^n\text{Pr}_3)_2(\text{H}_2\text{bim})]\text{Cl}$  for Pourbaix Diagram (continued 2)

| pH    | $E_c(\text{Re}^{\text{II}}/\text{Re}^{\text{III}})$ | $E_c(\text{Re}^{\text{III}}/\text{Re}^{\text{IV}})$ | $E_a(\text{Re}^{\text{III}}/\text{Re}^{\text{IV}})$ | $E_{1/2}(\text{Re}^{\text{III}}/\text{Re}^{\text{IV}})$ |
|-------|-----------------------------------------------------|-----------------------------------------------------|-----------------------------------------------------|---------------------------------------------------------|
| 7.8   | -1.043                                              | 0.049                                               | 0.143                                               | 0.096                                                   |
| 7.9   | -1.052                                              | 0.044                                               | 0.139                                               | 0.092                                                   |
| 8     | -1.059                                              | 0.037                                               | 0.131                                               | 0.084                                                   |
| 8.13  | -1.071                                              | 0.032                                               | 0.125                                               | 0.079                                                   |
| 8.24  | -1.078                                              | 0.026                                               | 0.12                                                | 0.073                                                   |
| 8.35  | -1.089                                              | 0.021                                               | 0.114                                               | 0.068                                                   |
| 8.43  | -1.093                                              | 0.012                                               | 0.103                                               | 0.058                                                   |
| 8.69  | -1.112                                              | 0.01                                                | 0.095                                               | 0.053                                                   |
| 8.8   | -1.12                                               | 0                                                   | 0.085                                               | 0.043                                                   |
| 9     | -1.131                                              | -0.006                                              | 0.074                                               | 0.034                                                   |
| 9.15  | -1.145                                              | -0.01                                               | 0.064                                               | 0.027                                                   |
| 9.22  | -1.149                                              | -0.016                                              | 0.059                                               | 0.022                                                   |
| 9.38  | -1.159                                              | -0.022                                              | 0.054                                               | 0.016                                                   |
| 9.44  | -1.162                                              | -0.028                                              | 0.049                                               | 0.011                                                   |
| 9.57  | -1.175                                              | -0.034                                              | 0.051                                               | 0.009                                                   |
| 9.72  | -1.179                                              | -0.046                                              | 0.029                                               | -0.009                                                  |
| 9.8   | -1.189                                              | -0.052                                              | 0.033                                               | -0.010                                                  |
| 9.92  | -1.195                                              | -0.054                                              | 0.022                                               | -0.016                                                  |
| 10.02 | -1.203                                              | -0.06                                               | 0.025                                               | -0.018                                                  |
| 10.12 | -1.205                                              | -0.067                                              | 0.019                                               | -0.024                                                  |
| 10.2  | -1.217                                              | -0.078                                              | 0.011                                               | -0.034                                                  |
| 10.3  | -1.217                                              | -0.081                                              | 0.004                                               | -0.039                                                  |
| 10.42 | -1.23                                               | -0.089                                              | 0.008                                               | -0.041                                                  |
| 10.5  | -1.234                                              | -0.092                                              | 0.001                                               | -0.046                                                  |
| 10.6  | -1.246                                              | -0.103                                              | -0.005                                              | -0.054                                                  |

[V] (vs.  $\text{Fc}/\text{Fc}^+$ )



Table S5 Redox potential at each pH of  $[\text{Re}^{\text{III}}\text{Cl}_2(\text{P}^n\text{Pr}_3)_2(\text{H}_2\text{bim})]\text{Cl}$  for Pourbaix Diagram  
(continued 3)

| pH    | $E_c(\text{Re}^{\text{II}}/\text{Re}^{\text{III}})$ | $E_c(\text{Re}^{\text{III}}/\text{Re}^{\text{IV}})$ | $E_a(\text{Re}^{\text{III}}/\text{Re}^{\text{IV}})$ | $E_{1/2}(\text{Re}^{\text{III}}/\text{Re}^{\text{IV}})$ |
|-------|-----------------------------------------------------|-----------------------------------------------------|-----------------------------------------------------|---------------------------------------------------------|
| 10.71 | -1.249                                              | -0.103                                              | -0.015                                              | -0.059                                                  |
| 10.79 | -1.265                                              | -0.109                                              | -0.023                                              | -0.066                                                  |
| 10.89 | -1.262                                              | -0.118                                              | -0.026                                              | -0.072                                                  |
| 10.99 | -1.286                                              | -0.123                                              | -0.031                                              | -0.077                                                  |
| 11.12 | -1.286                                              | -0.129                                              | -0.036                                              | -0.083                                                  |
| 11.2  | -1.31                                               | -0.137                                              | -0.045                                              | -0.091                                                  |
| 11.31 | -1.321                                              | -0.143                                              | -0.047                                              | -0.095                                                  |
| 11.41 | -1.321                                              | -0.146                                              | -0.05                                               | -0.098                                                  |
| 11.5  | -1.339                                              | -0.153                                              | -0.059                                              | -0.106                                                  |
| 11.61 | -1.345                                              | -0.155                                              | -0.062                                              | -0.109                                                  |
| 11.72 | -1.356                                              | -0.161                                              | -0.064                                              | -0.113                                                  |
| 11.8  | -1.367                                              | -0.164                                              | -0.066                                              | -0.115                                                  |
| 11.89 | -1.367                                              | -0.167                                              | -0.068                                              | -0.118                                                  |
| 12.01 | -1.369                                              | -0.172                                              | -0.069                                              | -0.121                                                  |

[V] (vs.  $\text{Fc}/\text{Fc}^+$ )
